# Supplementary material for: Crystal Structure, Hirshfeld Surface Analysis and Energy Framework Calculations of Different Metal Complexes of a Biphenol-based Ligand: Role of Solvent and Transition Metal Ion
Source: Preprints.org preprint supplement (doi:10.20944/preprints202306.0931.v1), 2023-06-13
Supplement: Supplementary file 1 [file supplementary]

# Crystal Structure, Hirshfeld Surface Analysis and Energy Framework Calculations of Different Metal Complexes of a Biphenol-based Ligand: Role of Solvent and Transition Metal Ion

Eleonora Macedi <sup>1,\*</sup>, Patrizia Rossi <sup>2</sup>, Mauro Formica <sup>1</sup>, Luca Giorgi <sup>1</sup>, Martina Lippi <sup>1</sup>, Riccardo Montis <sup>1</sup>, Daniele Paderni <sup>1</sup>, Paola Paoli <sup>2</sup>, Vieri Fusi <sup>1,\*</sup>

<sup>1</sup> Department of Pure and Applied Sciences, University of Urbino, via della Stazione, 4, 61029 Urbino, Italy; [eleonora.macedi@uniurb.it](mailto:eleonora.macedi@uniurb.it)

<sup>2</sup> Department of Industrial Engineering, University of Florence, via S. Marta 3, 50139 Florence, Italy; [p.rossi@unifi.it](mailto:p.rossi@unifi.it)

\* Correspondence: [vieri.fusi@uniurb.it](mailto:vieri.fusi@uniurb.it)

## Contents

|                                                                                                                                                                                                                  |    |
|------------------------------------------------------------------------------------------------------------------------------------------------------------------------------------------------------------------|----|
| Table S1. Distances (Å) and angles (°) involving the Pd(II) ion and dihedral angles in compound 6                                                                                                                | 2  |
| Figure S1. Superimposition of the [Pd(H <sub>2</sub> L)] complex (6) (ball and stick) and OTIYEX (4) (stick, green).                                                                                             | 3  |
| Figure S2. Superimposition of the [Pd(H <sub>2</sub> L)] complex (6) (ball and stick) and OTIYIB (5) (stick, pink).                                                                                              | 3  |
| Figure S3. Disposition of the two methyl groups in [Pd(H <sub>2</sub> L)] (6) (left, yellow) and OTIYIB (5) (right, pale blue).                                                                                  | 3  |
| Table S2. Selected interactions within the crystal packing of 6.                                                                                                                                                 | 4  |
| Figure S4. Energy frameworks of 6 (view along the b (top) and c (bottom) axes). Total energy as blue cylinders, Coulomb energy as red cylinders, dispersion energy as green cylinders.                           | 5  |
| Figure S5. Hirshfeld surface of 5 mapped over shape index (left) and curvedness (right). Magenta ovals refer to $\pi$ - $\pi$ stacking interactions.                                                             | 5  |
| Table S3. Selected interactions within the crystal packing of 5.                                                                                                                                                 | 6  |
| Figure S6. Energy frameworks of 5 (view along the a (top), b (middle) and c (bottom) axes). Total energy as blue cylinders, Coulomb energy as red cylinders, dispersion energy as green cylinders.               | 6  |
| Figure S7. Hirshfeld surfaces mapped over $d_{\text{norm}}$ (left), shape index (middle) and curvedness (right) of 1 (top) and 2 (bottom). Globularity: 0.727 (1), 0.777 (2); asphericity: 0.085 (1), 0.136 (2). | 7  |
| Figure S8. 2D and decomposed fingerprint plots for compounds 1 (a) and 2 (b).                                                                                                                                    | 7  |
| Table S4. Selected interactions within the crystal packing of 1 and 2.                                                                                                                                           | 8  |
| Figure S9. Hirshfeld surfaces mapped over $d_{\text{norm}}$ (left), shape index (middle) and curvedness (right) of 3. Front (top) and back (bottom) views. Globularity: 0.751; asphericity: 0.008.               | 8  |
| Figure S10. 2D and decomposed fingerprint plots for compound 3.                                                                                                                                                  | 9  |
| Figure S11. Hirshfeld surfaces mapped over $d_{\text{norm}}$ (left), shape index (middle) and curvedness (right) of 4. Front (top) and back (bottom) views. Globularity: 0.531; asphericity: 0.050.              | 9  |
| Figure S12. 2D and decomposed fingerprint plots for compound 4.                                                                                                                                                  | 10 |
| Table S5. Selected interactions within the crystal packing of 3 and 4.                                                                                                                                           | 11 |

Table S1. Distances (Å) and angles (°) involving the Pd(II) ion and dihedral angles in compound **6**.

| <b>Pd-X (Å)</b>             |                                 |
|-----------------------------|---------------------------------|
| Pd1-N1                      | 2.02(1)                         |
| Pd1-N2                      | 2.02(1)                         |
| Pd1-O1                      | 2.01(1)                         |
| Pd1-O3                      | 2.026(9)                        |
| Pd-N (CSD)                  | 1.997-2.105 (mean value: 2.044) |
| Pd-O (CSD)                  | 1.968-2.095 (mean value: 2.014) |
| <b>X-Pd-Y (°)</b>           |                                 |
| N1-Pd1-N2                   | 87.4(5)                         |
| N1-Pd1-O1                   | 93.5(5)                         |
| N1-Pd1-O3                   | 176.1(4)                        |
| N2-Pd1-O1                   | 174.4(5)                        |
| N2-Pd1-O3                   | 88.8(4)                         |
| O1-Pd1-O3                   | 90.3(4)                         |
| <b>Dihedral angles (°)</b>  |                                 |
| C3-C2-C1-N1 ( $\tau_1$ )    | 56(2) +sc                       |
| C2-C1-N1-C15 ( $\tau_2$ )   | -180(1) ap                      |
| C1-N1-C15-C16 ( $\tau_3$ )  | 166(1) ap                       |
| N1-C15-C16-N2 ( $\tau_4$ )  | -53(2) -sc                      |
| C15-C16-N2-C18 ( $\tau_5$ ) | -82(2) -sc                      |
| C16-N2-C18-C19 ( $\tau_6$ ) | -178(1) ap                      |
| N2-C18-C19-C20 ( $\tau_7$ ) | -34(2) -sc                      |

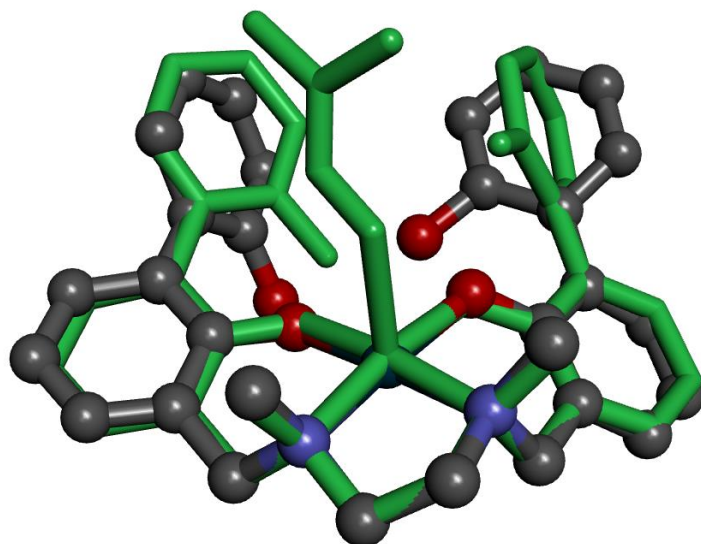

Figure S1. Superimposition of the [Pd(H<sub>2</sub>L)] complex (6) (ball and stick) and OTIYEX (4) (stick, green).

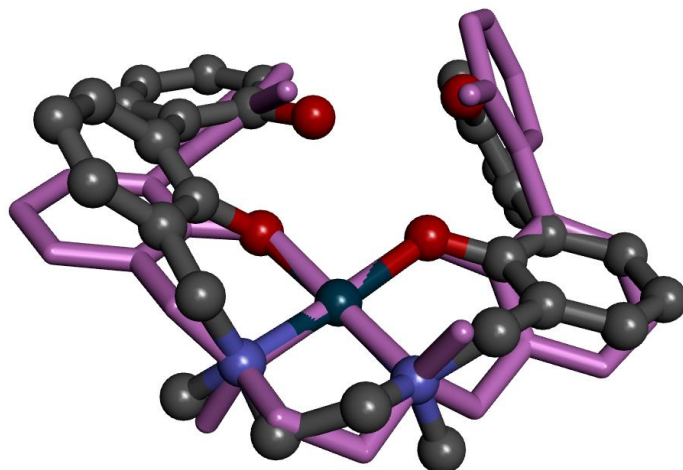

Figure S2. Superimposition of the [Pd(H<sub>2</sub>L)] complex (6) (ball and stick) and OTIYIB (5) (stick, pink).

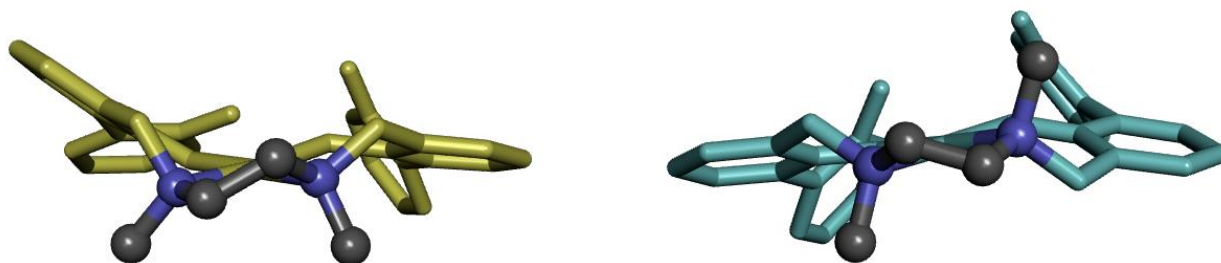

Figure S3. Disposition of the two methyl groups in [Pd(H<sub>2</sub>L)] (6) (left, yellow) and OTIYIB (5) (right, pale blue).

Table S2. Selected interactions within the crystal packing of **6**.

| <i>D-H</i> ... <i>A</i>     | <i>D</i> ... <i>A</i> (Å) | <i>H</i> ... <i>A</i> (Å) | ∠ <i>D-H</i> ... <i>A</i> (°) |
|-----------------------------|---------------------------|---------------------------|-------------------------------|
| C1-H1A...Pd1 <sup>a</sup>   | 3.59                      | 2.61                      | 167                           |
| C15-H15A...C26 <sup>a</sup> | 3.42                      | 2.79                      | 122                           |
| C18-H18B...C30 <sup>a</sup> | 3.57                      | 2.80                      | 134                           |
| C17-H17C...C19 <sup>a</sup> | 3.54                      | 2.80                      | 133                           |
| C28-H28...C26 <sup>b</sup>  | 3.64                      | 2.87                      | 139                           |
| C15-H15A...O3 <sup>a</sup>  | 3.54                      | 2.56                      | 169                           |
| C18-H18A...O3 <sup>a</sup>  | 3.64                      | 2.66                      | 175                           |
| C14-H14C...O2 <sup>a</sup>  | 3.45                      | 2.50                      | 164                           |
| C28-H28...O4 <sup>b</sup>   | 3.50                      | 2.61                      | 156                           |
| C11-H11...O2 <sup>b</sup>   | 3.32                      | 2.47                      | 148                           |

<sup>a</sup> -1/2+x,y,1.5-z; <sup>b</sup> -1/2+x,y,1/2-z

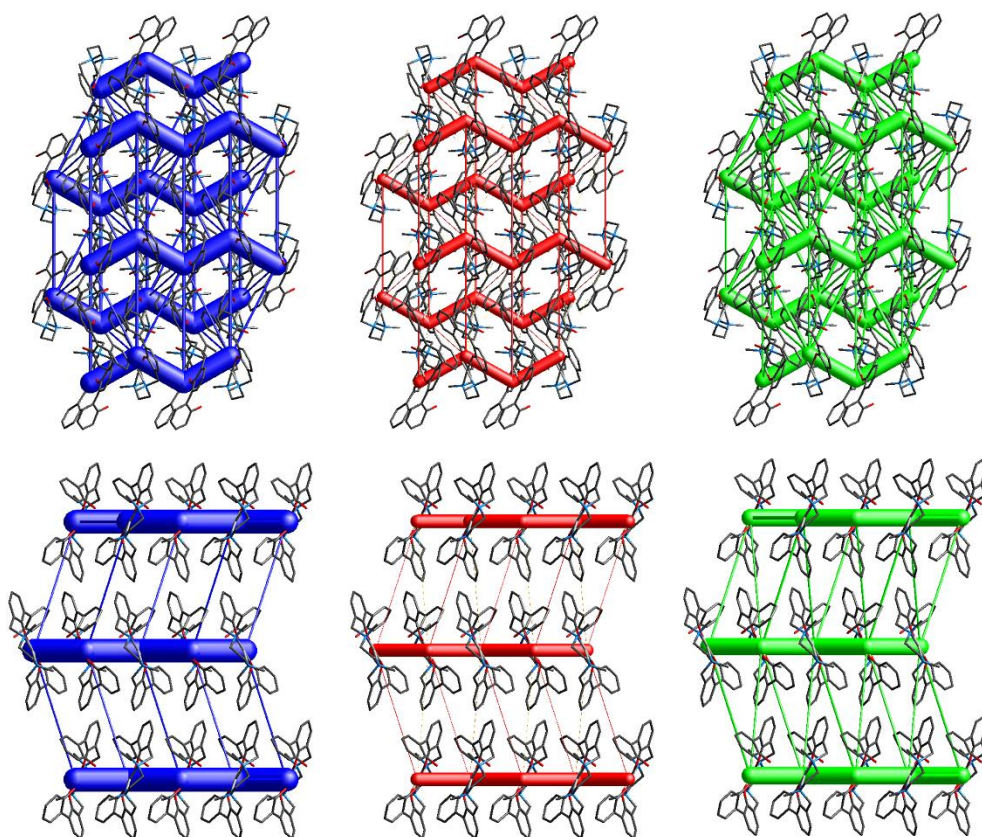

Figure S4. Energy frameworks of **6** (view along the *b* (top) and *c* (bottom) axes). Total energy as blue cylinders, Coulomb energy as red cylinders, dispersion energy as green cylinders.

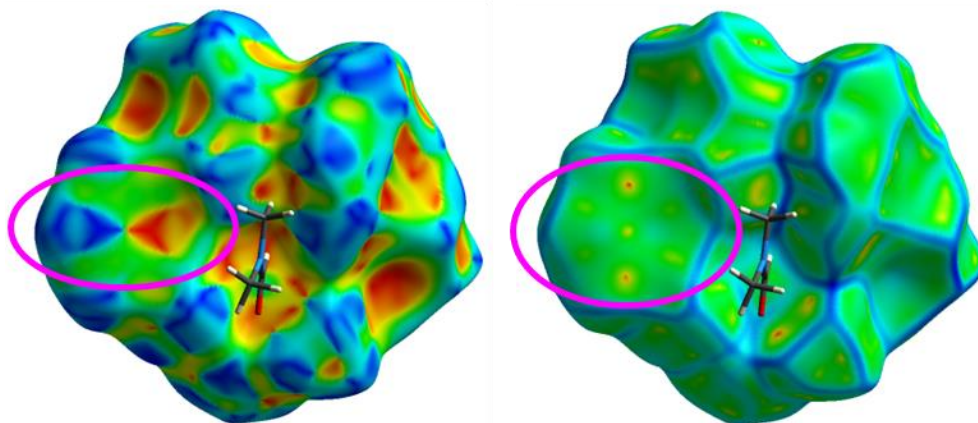

Figure S5. Hirshfeld surface of **5** mapped over shape index (left) and curvedness (right). Magenta ovals refer to  $\pi$ - $\pi$  stacking interactions.



Table S3. Selected interactions within the crystal packing of **5**.

| 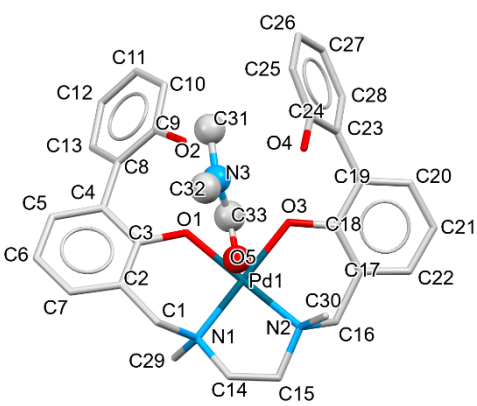 | <i>D</i> – <i>H</i> ⋯ <i>A</i> | <i>D</i> ⋯ <i>A</i> (Å) | <i>H</i> ⋯ <i>A</i> (Å) | ∠ <i>D</i> – <i>H</i> ⋯ <i>A</i> (°) |
|-----------------------------------------------------------------------------------|--------------------------------|-------------------------|-------------------------|--------------------------------------|
|                                                                                   | C31–H31⋯O2                     | 3.28                    | 2.45                    | 147                                  |
|                                                                                   | C1–H3⋯O5                       | 3.58                    | 2.64                    | 158                                  |
|                                                                                   | C16–H16⋯O5 <sup>a</sup>        | 3.32                    | 2.37                    | 174                                  |
|                                                                                   | C22–H20⋯C12 <sup>b</sup>       | 3.61                    | 2.89                    | 141                                  |
|                                                                                   | C22–H20⋯C13 <sup>b</sup>       | 3.58                    | 2.72                    | 166                                  |
|                                                                                   | C14–H12⋯C23 <sup>b</sup>       | 3.75                    | 2.96                    | 152                                  |
|                                                                                   | C14–H12⋯C28 <sup>b</sup>       | 3.79                    | 2.92                    | 178                                  |
|                                                                                   | C11⋯C32 <sup>c</sup>           | 3.30                    |                         |                                      |
|                                                                                   | C7⋯C5 <sup>d</sup>             | 3.56                    |                         |                                      |
|                                                                                   | C6⋯C6 <sup>d</sup>             | 3.58                    |                         |                                      |

<sup>a</sup> 1–*x*, 1/2+*y*, 1/2–*z*; <sup>b</sup> *x*, 1/2–*y*, –1/2+*z*; <sup>c</sup> *x*, 1+*y*, *z*; <sup>d</sup> 1–*x*, –*y*, –*z*

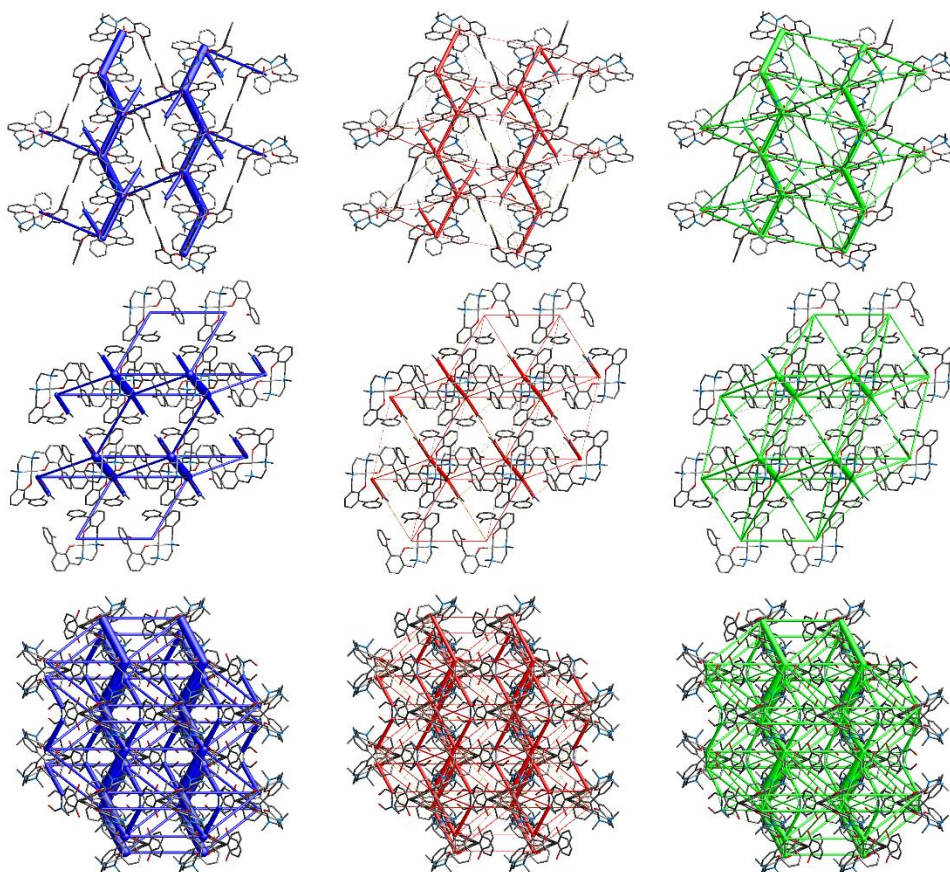

Figure S6. Energy frameworks of **5** (view along the *a* (top), *b* (middle) and *c* (bottom) axes). Total energy as blue cylinders, Coulomb energy as red cylinders, dispersion energy as green cylinders.

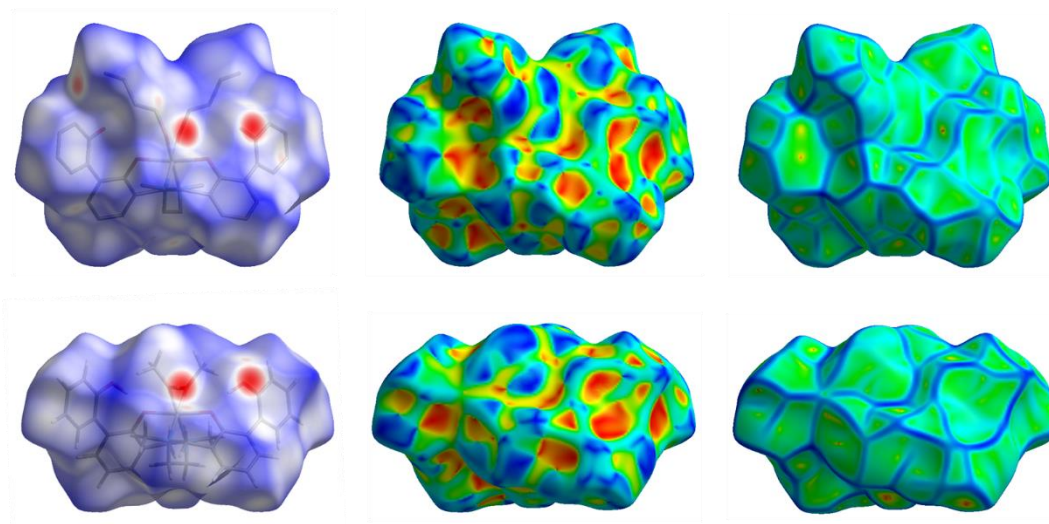

Figure S7. Hirshfeld surfaces mapped over  $d_{\text{norm}}$  (left), shape index (middle) and curvedness (right) of **1** (top) and **2** (bottom). Globularity: 0.727 (**1**), 0.777 (**2**); asphericity: 0.085 (**1**), 0.136 (**2**).

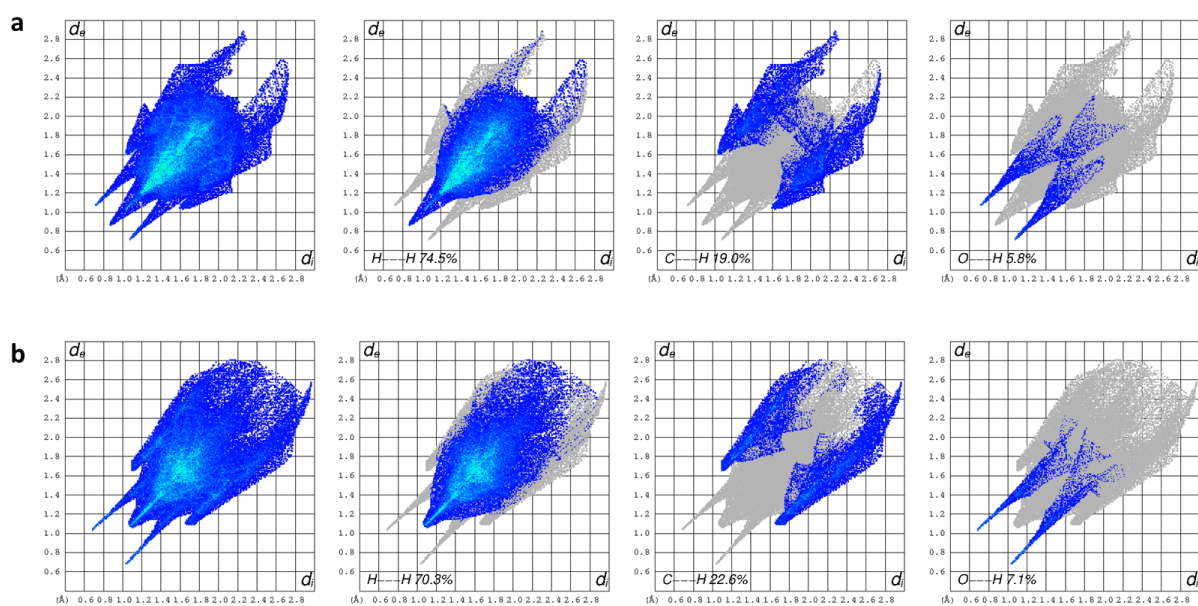

Figure S8. 2D and decomposed fingerprint plots for compounds **1** (a) and **2** (b).

Table S4. Selected interactions within the crystal packing of **1** and **2**.

| 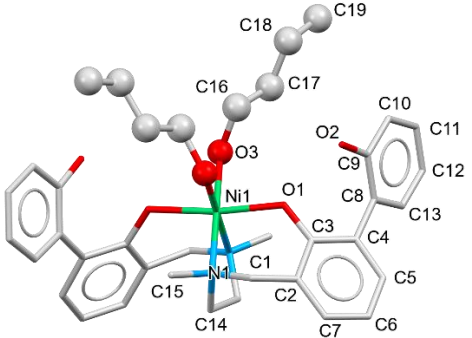 | <i>D</i> – <i>H</i> ... <i>A</i> | <i>D</i> ... <i>A</i> (Å) | <i>H</i> ... <i>A</i> (Å) | ∠ <i>D</i> – <i>H</i> ... <i>A</i> (°) |
|-----------------------------------------------------------------------------------|----------------------------------|---------------------------|---------------------------|----------------------------------------|
|                                                                                   | O3–H16...O2A <sup>a</sup>        | 2.77                      | 1.94                      | 169                                    |
|                                                                                   | C1–H3...O2 <sup>b</sup>          | 3.56                      | 2.60                      | 157                                    |
|                                                                                   | C17–H20...C8A <sup>a</sup>       | 3.63                      | 2.73                      | 148                                    |
|                                                                                   | C17–H20...C9A <sup>a</sup>       | 3.68                      | 2.82                      | 143                                    |
|                                                                                   | O3–H16...C9A <sup>a</sup>        | 3.31                      | 2.62                      | 140                                    |
|                                                                                   | C11...C11 <sup>c</sup>           | 3.43                      |                           |                                        |
|  | O3–H16...O2A <sup>d</sup>        | 2.69                      | 1.84                      | 169                                    |
|                                                                                   | C1–H2...O2 <sup>d</sup>          | 3.53                      | 2.54                      | 164                                    |
|                                                                                   | O3–H16...C9 <sup>d</sup>         | 3.42                      | 2.70                      | 142                                    |
|                                                                                   | C16–H17...C4 <sup>d</sup>        | 3.68                      | 2.92                      | 145                                    |
|                                                                                   | C12–H9...C7A <sup>e</sup>        | 3.71                      | 2.98                      | 137                                    |
|                                                                                   | C5...C12 <sup>f</sup>            | 3.68                      |                           |                                        |

<sup>a</sup>  $-1/2+x, 1.5-y, -1/2+z$ ; <sup>b</sup>  $1.5-x, 1.5-y, 1-z$ ; <sup>c</sup>  $1.5-x, 1.5-y, 2-z$ ; <sup>d</sup>  $-x, -y, 1-z$ ; <sup>e</sup>  $1/2+x, 1/2-y, 1/2+z$ ; <sup>f</sup>  $1/2-x, 1/2-y, 1-z$ .

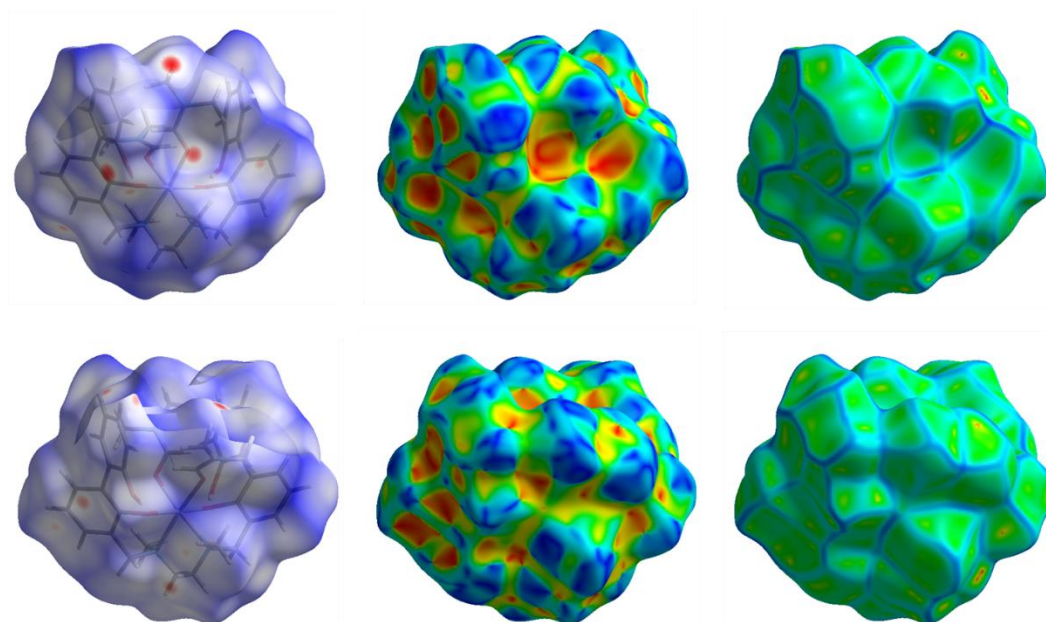

Figure S9. Hirshfeld surfaces mapped over  $d_{\text{norm}}$  (left), shape index (middle) and curvedness (right) of **3**. Front (top) and back (bottom) views. Globularity: 0.751; asphericity: 0.008.



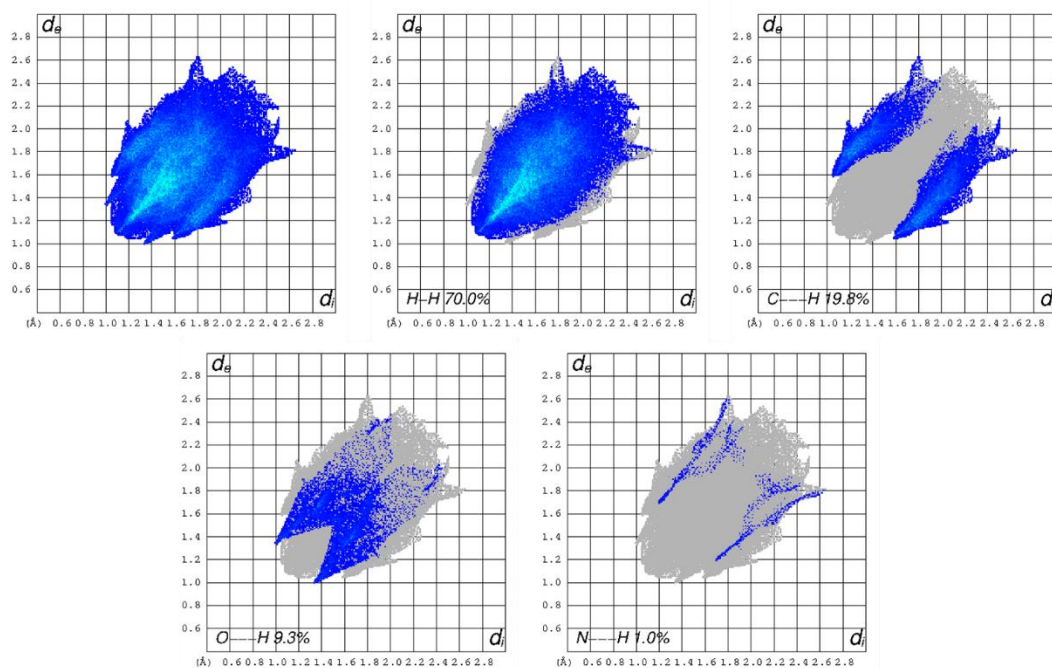

Figure S10. 2D and decomposed fingerprint plots for compound **3**.

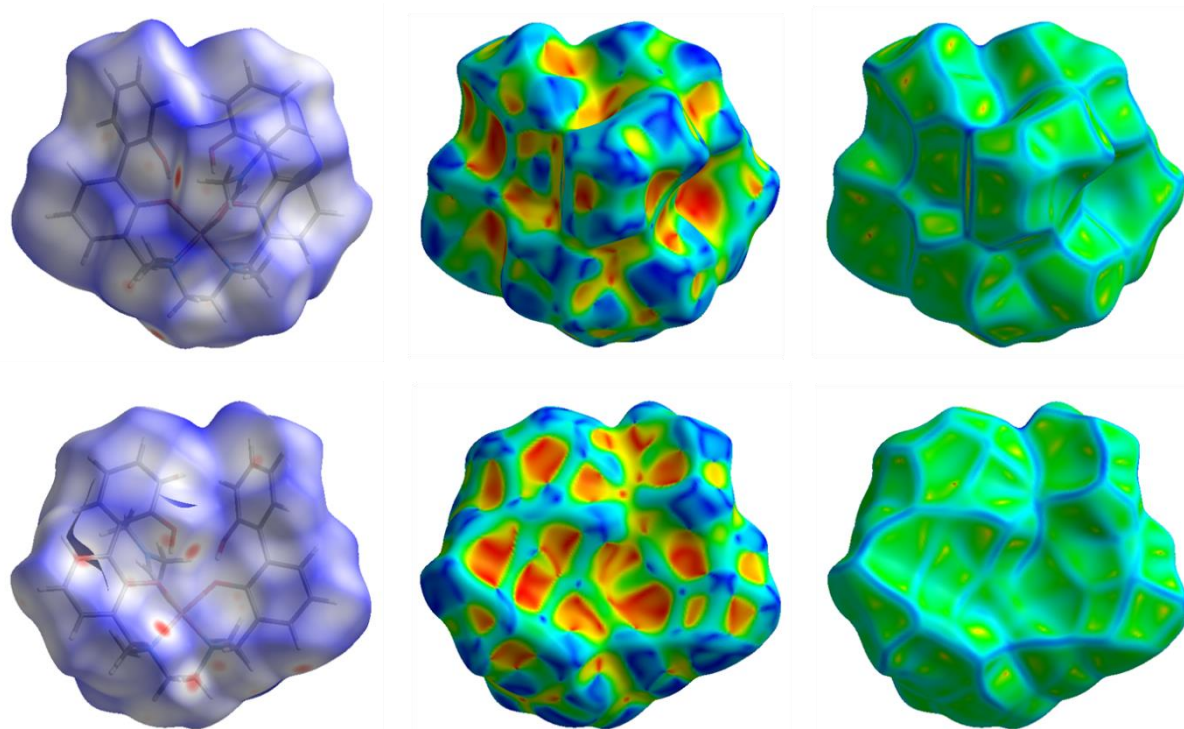

Figure S11. Hirshfeld surfaces mapped over  $d_{\text{norm}}$  (left), shape index (middle) and curvedness (right) of **4**. Front (top) and back (bottom) views. Globularity: 0.531; asphericity: 0.050.

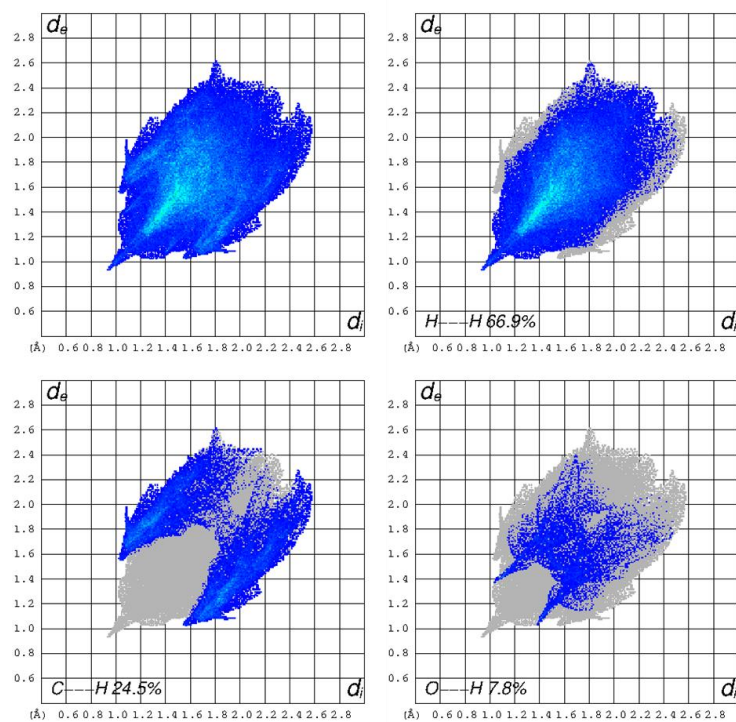

Figure S12. 2D and decomposed fingerprint plots for compound 4.

Table S5. Selected interactions within the crystal packing of **3** and **4**.

| 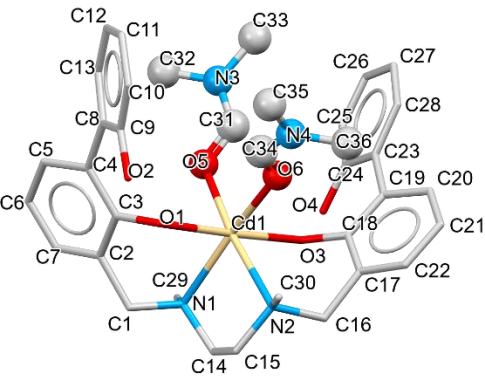  | <i>D</i> – <i>H</i> ... <i>A</i> | <i>D</i> ... <i>A</i> (Å) | <i>H</i> ... <i>A</i> (Å) | ∠ <i>D</i> – <i>H</i> ... <i>A</i> (°) |
|------------------------------------------------------------------------------------|----------------------------------|---------------------------|---------------------------|----------------------------------------|
|                                                                                    | C33–H34...O4 <sup>a</sup>        | 3.42                      | 2.46                      | 167                                    |
|                                                                                    | C35–H39...O5 <sup>b</sup>        | 3.48                      | 2.53                      | 165                                    |
|                                                                                    | C15–H12...C4 <sup>c</sup>        | 3.64                      | 2.74                      | 151                                    |
|                                                                                    | C30–H28...C6 <sup>c</sup>        | 3.68                      | 2.82                      | 148                                    |
|                                                                                    | C32–H30...C22 <sup>d</sup>       | 3.73                      | 2.78                      | 163                                    |
|                                                                                    | C35–H37...C28 <sup>e</sup>       | 3.76                      | 2.92                      | 144                                    |
|                                                                                    | C36–H40...C27 <sup>e</sup>       | 3.84                      | 2.95                      | 151                                    |
|                                                                                    | C36–H41...C6 <sup>b</sup>        | 3.56                      | 2.78                      | 137                                    |
|  | C14–H13...O2 <sup>f</sup>        | 3.49                      | 2.53                      | 170                                    |
|                                                                                    | C16–H17...O2 <sup>f</sup>        | 3.43                      | 2.58                      | 147                                    |
|                                                                                    | C12–H10...C6 <sup>g</sup>        | 3.61                      | 2.93                      | 130                                    |
|                                                                                    | C14–H12...C17 <sup>f</sup>       | 3.78                      | 2.86                      | 159                                    |
|                                                                                    | C14–H12...C18 <sup>f</sup>       | 3.52                      | 2.81                      | 131                                    |
|                                                                                    | C15–H15...C10 <sup>h</sup>       | 3.84                      | 2.87                      | 179                                    |
|                                                                                    | C16–H16...C3 <sup>f</sup>        | 3.59                      | 2.81                      | 138                                    |
|                                                                                    | C22–H20...C5 <sup>f</sup>        | 3.62                      | 2.72                      | 161                                    |
|                                                                                    | C22–H20...C6 <sup>f</sup>        | 3.86                      | 2.94                      | 170                                    |
|                                                                                    | C25–H21...C26 <sup>i</sup>       | 3.84                      | 2.98                      | 154                                    |
|                                                                                    | C30–H30...C27 <sup>h</sup>       | 3.44                      | 2.74                      | 130                                    |

<sup>a</sup>  $-1/2+x, 1/2-y, 1-z$ ; <sup>b</sup>  $1-x, -1/2+y, 1.5-z$ ; <sup>c</sup>  $-1/2+x, 1/2-y, 2-z$ ; <sup>d</sup>  $-1+x, y, z$ ; <sup>e</sup>  $1/2-x, -y, -1/2+z$ ; <sup>f</sup>  $1.5-x, -1/2+y, 1/2-z$ ; <sup>g</sup>  $1/2-x, -1/2+y, 1/2-z$ ; <sup>h</sup>  $x, -1+y, z$ ; <sup>i</sup>  $1-x, 1-y, 1-z$
